# Supplementary material for: Structural, optical and photo-electrochemical properties of hydrothermally grown ZnO nanorods arrays covered with α-Fe2O3 nanoparticles
Source: Royal Society of Chemistry journal article supplement (doi:10.1039/c6ra15752a), 2016-01-01
Supplement: c6ra15752a1.pdf [file c6ra15752a1.pdf]

## Supplementary Information

Mohua Chakraborty<sup>1</sup>, Dhrubojyoti Roy<sup>2</sup>, Amrita Biswas<sup>3</sup>, R.Thangavel<sup>1\*</sup>, G.Udayabhanu<sup>3</sup>

<sup>1</sup>Solar Energy Research Laboratory, Department of Applied Physics, Indian School of Mines, Dhanbad 826 004, India

<sup>2</sup>Samtel unit, Indian Institute of Technology Kanpur, Uttar Pradesh 208 016, India

<sup>3</sup>Department of Applied Chemistry, Indian School of Mines, Dhanbad 826 004, India

\* [thangavel.r.ap@ismdhanbad.ac.in](mailto:thangavel.r.ap@ismdhanbad.ac.in), [rthangavel@gmail.com](mailto:rthangavel@gmail.com);

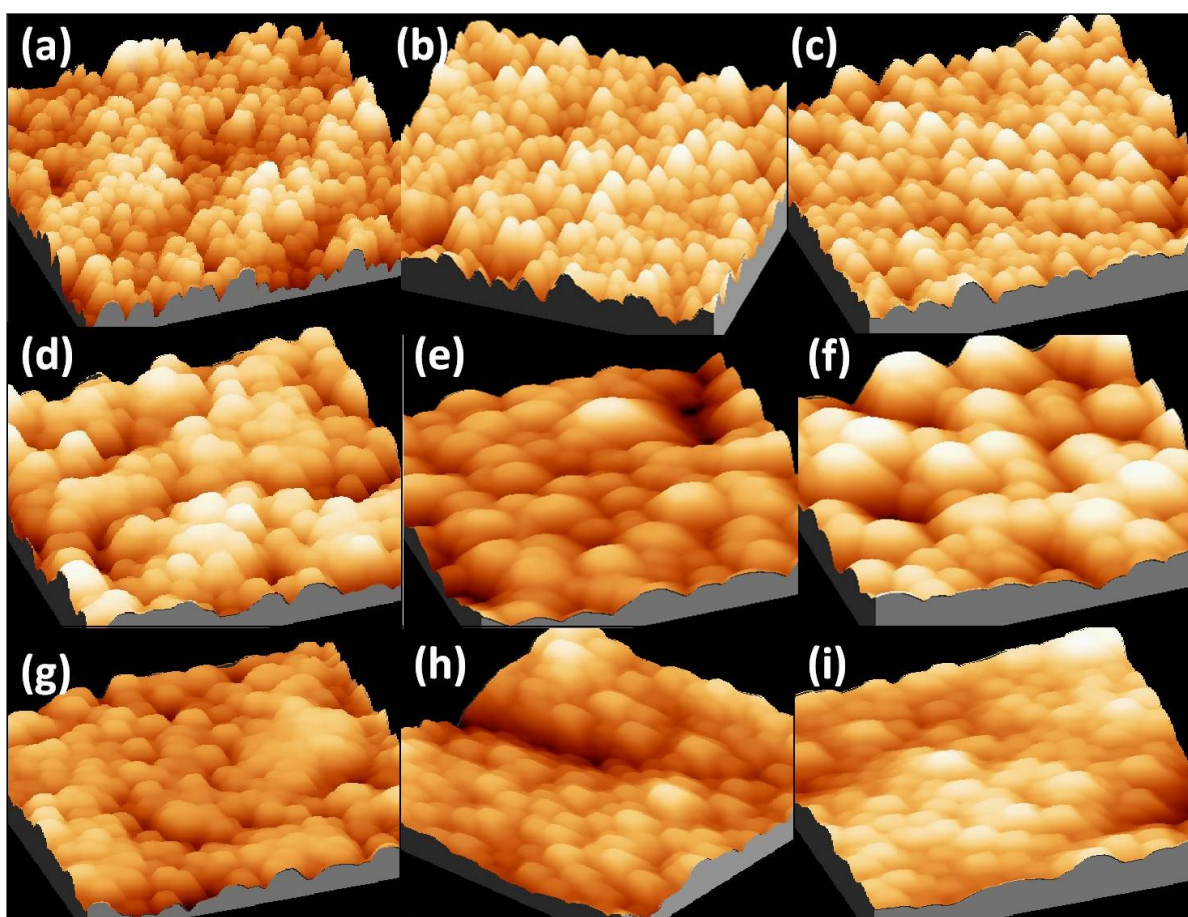

**Fig. S1** AFM images of (a) bare ZnO NRs, (b) Z/F2min (c) Z/F5min (d) Z/F15min, (e) Z/F30min, (f) Z/F1h, (g) Z/F2h (h) Z/F6h (i) Z/F12h thin film samples.

| <b>Table S1: Particle size and Surface roughness with AFM analysis</b> |                           |                               |
|------------------------------------------------------------------------|---------------------------|-------------------------------|
| <b>Sample</b>                                                          | <b>Particle Size (nm)</b> | <b>Surface Roughness (nm)</b> |
| ZnO                                                                    | 120                       | 94.29                         |
| Z/F2 min                                                               | 133                       | 82.46                         |
| Z/F5 min                                                               | 145                       | 71.78                         |
| Z/F15 min                                                              | 175                       | 61.32                         |
| Z/F30 min                                                              | 250                       | 61.11                         |
| Z/F1h                                                                  | 330                       | 50.86                         |
| Z/F2h                                                                  | 347                       | 67.25                         |
| Z/F6h                                                                  | 375                       | 123.56                        |
| Z/F12h                                                                 | 390                       | 131.94                        |
